# Supplementary material for: Refining crystal structures using 13C NMR chemical shift tensors as a target function
Source: Royal Society of Chemistry journal article supplement (doi:10.1039/d1ce00960e), 2021-01-01
Supplement: d1ce00960e1.pdf [file d1ce00960e1.pdf]

## Supporting Information:

**Table 1.** Experimental and Computed Chemical Shifts for  $^{13}\text{C}$

|                                              | Atom # | Exp   | GIPAW RPBE |         |       |       |
|----------------------------------------------|--------|-------|------------|---------|-------|-------|
|                                              |        |       | X/N D      | DFT-D2* | NMR   | PW91  |
| Naphthalene<br>NAPHTHA06                     | 1      | 208.5 | -38.8      | -33.4   | -38.9 | -41.5 |
|                                              |        | 202.2 | -33.9      | -28.6   | -29.8 | -36.3 |
|                                              | 2      | -5.9  | 194.1      | 189.7   | 178.4 | 175.4 |
|                                              |        | 227.6 | -56.4      | -54.5   | -55.3 | -59.0 |
|                                              |        | 139.3 | 28.8       | 32.8    | 29.2  | 25.0  |
|                                              |        | 11.1  | 196.9      | 173.9   | 163.0 | 159.7 |
|                                              | 3      | 224.7 | -55.2      | -52.0   | -50.3 | -53.4 |
|                                              |        | 140.3 | 28.2       | 30.5    | 27.3  | 24.8  |
|                                              |        | 22.8  | 178.7      | 162.1   | 151.3 | 146.7 |
|                                              | 4      | 223.9 | -54.7      | -50.7   | -51.0 | -54.3 |
|                                              |        | 145.6 | 22.1       | 24.5    | 31.2  | 27.5  |
|                                              |        | 20.5  | 184.8      | 164.8   | 147.8 | 144.1 |
| 4a                                           | 227.6  | -59.2 | -54.3      | -56.5   | -60.9 |       |
|                                              | 138.2  | 31.4  | 33.0       | 30.2    | 27.8  |       |
| Methyl $\beta$ -D-Xylopyranoside<br>XYLOBM02 | 1      | 10.4  | 194.3      | 175.0   | 162.9 | 158.7 |
|                                              |        | 119.0 | 49.1       | 45.6    | 50.1  | -     |
|                                              |        | 102.8 | 72.0       | 70.0    | 70.5  | -     |
|                                              | 2      | 90.7  | 85.0       | 85.3    | 83.3  | -     |
|                                              |        | 91.9  | 79.2       | 77.6    | 78.0  | -     |
|                                              |        | 71.9  | 101.5      | 102.7   | 100.1 | -     |
|                                              | 3      | 52.8  | 123.8      | 128.8   | 120.0 | -     |
|                                              |        | 89.5  | 81.9       | 81.1    | 84.0  | -     |
|                                              |        | 79.0  | 93.0       | 94.1    | 91.0  | -     |
|                                              | 4      | 66.1  | 112.5      | 114.0   | 106.1 | -     |
|                                              |        | 90.6  | 79.6       | 78.7    | 81.0  | -     |
|                                              |        | 71.7  | 102.7      | 104.0   | 102.0 | -     |
|                                              | 5      | 46.3  | 130.6      | 131.6   | 124.8 | -     |
|                                              |        | 96.1  | 76.1       | 75.8    | 74.4  | -     |
|                                              |        | 80.9  | 92.6       | 93.0    | 90.4  | -     |
|                                              | 6      | 23.6  | 154.7      | 157.5   | 149.8 | -     |
|                                              |        | 90.0  | 88.8       | 80.9    | 83.2  | -     |
|                                              |        | 74.6  | 104.3      | 98.3    | 100.6 | -     |
| Methyl $\alpha$ -D-Glucopyranoside<br>MGLUCP | 1      | 7.4   | 189.1      | 178.2   | 162.2 | -     |
|                                              |        | 119.5 | 48.3       | 47.1    | 51.5  | -     |
|                                              |        | 95.1  | 78.0       | 77.9    | 78.3  | -     |
|                                              | 2      | 88.2  | 83.4       | 85.6    | 84.2  | -     |
|                                              |        | 87.2  | 82.5       | 81.4    | 82.5  | -     |
|                                              |        | 77.9  | 97.6       | 98.5    | 94.2  | -     |
|                                              | 3      | 51.7  | 127.1      | 129.8   | 121.7 | -     |
|                                              |        | 93.8  | 75.3       | 75.9    | 75.6  | -     |
|                                              |        | 72.9  | 102.3      | 103.1   | 100.7 | -     |
|                                              | 4      | 57.0  | 120.4      | 122.6   | 115.2 | -     |
|                                              |        | 88.0  | 83.6       | 83.4    | 84.5  | -     |
|                                              |        | 78.2  | 96.1       | 96.3    | 94.2  | -     |
|                                              | 5      | 51.2  | 125.4      | 127.4   | 119.3 | -     |
|                                              |        | 96.6  | 75.1       | 74.7    | 73.0  | -     |
|                                              |        | 73.3  | 101.8      | 102.2   | 97.6  | -     |
|                                              | 6      | 56.1  | 120.0      | 123.3   | 116.4 | -     |
|                                              |        | 89.2  | 79.6       | 79.4    | 80.3  | -     |
|                                              |        | 69.6  | 107.4      | 108.0   | 103.0 | -     |

|               |    |       |       |       |       |   |
|---------------|----|-------|-------|-------|-------|---|
|               |    | 32.5  | 149.1 | 150.5 | 140.6 | - |
|               | 7  | 88.3  | 88.5  | 85.7  | 82.5  | - |
|               |    | 70.0  | 105.2 | 101.9 | 101.3 | - |
|               |    | 11.2  | 178.3 | 174.2 | 158.7 | - |
| Sucrose       | 1  | 123.8 | 44.6  | 44.5  | 44.1  | - |
| SUCROS04      |    | 89.1  | 83.7  | 85.3  | 87.6  | - |
|               |    | 69.1  | 105.0 | 108.4 | 106.0 | - |
|               | 2  | 94.2  | 75.8  | 75.4  | 77.3  | - |
|               |    | 74.5  | 100.1 | 102.9 | 97.5  | - |
|               |    | 53.6  | 121.9 | 126.0 | 119.3 | - |
|               | 3  | 91.8  | 78.0  | 76.9  | 76.0  | - |
|               |    | 73.3  | 100.4 | 101.5 | 100.4 | - |
|               |    | 53.6  | 125.9 | 128.9 | 119.5 | - |
|               | 4  | 86.0  | 85.5  | 83.0  | 85.0  | - |
|               |    | 77.1  | 95.4  | 98.9  | 98.9  | - |
|               |    | 40.7  | 137.4 | 140.9 | 132.0 | - |
|               | 5  | 93.7  | 75.8  | 75.7  | 74.4  | - |
|               |    | 82.8  | 91.6  | 93.3  | 92.8  | - |
|               |    | 44.2  | 131.0 | 133.5 | 126.1 | - |
|               | 6  | 86.3  | 83.8  | 83.3  | 84.4  | - |
|               |    | 67.2  | 107.7 | 109.1 | 101.6 | - |
|               |    | 28.1  | 151.6 | 154.8 | 144.9 | - |
|               | 7  | 120.6 | 47.7  | 45.9  | 46.8  | - |
|               |    | 97.7  | 74.8  | 74.3  | 77.7  | - |
|               |    | 89.9  | 83.3  | 82.6  | 85.8  | - |
|               | 8  | 104.1 | 65.6  | 65.5  | 66.2  | - |
|               |    | 77.4  | 96.4  | 98.9  | 97.3  | - |
|               |    | 68.5  | 106.5 | 111.3 | 106.3 | - |
|               | 9  | 103.6 | 67.4  | 67.8  | 63.6  | - |
|               |    | 66.1  | 107.6 | 110.4 | 104.9 | - |
|               |    | 46.7  | 131.1 | 133.0 | 129.1 | - |
|               | 10 | 105.5 | 67.4  | 68.7  | 70.3  | - |
|               |    | 92.2  | 78.3  | 81.3  | 77.4  | - |
|               |    | 48.4  | 127.1 | 132.0 | 122.7 | - |
|               | 11 | 84.3  | 86.2  | 86.1  | 83.7  | - |
|               |    | 69.8  | 103.4 | 105.5 | 104.0 | - |
|               |    | 29.8  | 149.7 | 151.7 | 141.2 | - |
|               | 12 | 87.1  | 84.2  | 85.0  | 80.6  | - |
|               |    | 74.4  | 101.9 | 104.8 | 100.1 | - |
|               |    | 38.0  | 139.6 | 143.7 | 132.6 | - |
| Acetaminophen | 1  | 228.9 | -56.1 | -46.4 | -50.5 | - |
| HXACAN01      |    | 133.4 | 39.9  | 35.7  | 33.1  | - |
|               |    | 36.8  | 141.2 | 139.9 | 130.9 | - |
|               | 2  | 203.5 | -36.1 | -35.7 | -34.5 | - |
|               |    | 150.4 | 19.7  | 22.8  | 21.5  | - |
|               |    | 16.2  | 185.9 | 173.3 | 164.2 | - |
|               | 3  | 193.5 | -26.2 | -23.3 | -24.0 | - |
|               |    | 130.0 | 41.9  | 44.1  | 40.6  | - |
|               |    | 25.4  | 174.5 | 163.7 | 151.2 | - |
|               | 4  | 238.1 | -64.6 | -59.3 | -62.3 | - |
|               |    | 154.2 | 13.7  | 11.8  | 9.5   | - |
|               |    | 64.6  | 111.1 | 110.7 | 105.9 | - |
|               | 5  | 188.8 | -20.9 | -22.3 | -19.9 | - |
|               |    | 133.4 | 44.5  | 46.4  | 40.7  | - |
|               |    | 24.7  | 176.9 | 160.5 | 143.0 | - |
|               | 6  | 194.8 | -31.7 | -31.7 | -27.1 | - |
|               |    | 139.4 | 37.0  | 38.3  | 33.4  | - |
|               |    | 27.5  | 177.4 | 161.8 | 147.9 | - |
|               | 7  | 245.8 | -69.8 | -67.1 | -76.5 | - |

|   |       |       |       |       |   |
|---|-------|-------|-------|-------|---|
|   | 174.8 | 7.3   | 4.9   | -4.1  | - |
|   | 88.8  | 88.1  | 85.1  | 84.1  | - |
| 8 | 46.5  | 152.2 | 136.4 | 117.9 | - |
|   | 27.5  | 156.0 | 148.3 | 146.0 | - |
|   | -2.5  | 216.5 | 182.3 | 173.7 | - |

---

---
